# Supplementary material for: A complete data processing workflow for cryo-ET and subtomogram averaging
Source: Springer Nature journal article supplement (doi:10.1038/s41592-019-0591-8), 2019-10-14
Supplement: 41592_2019_591_MOESM3_ESM.pdf [file 41592_2019_591_MOESM3_ESM.pdf]

**Supplementary Table 1**

| <b>Task</b>                             | <b>Program name</b>               | <b># Cores</b> | <b>Walltime (min)</b> | <b>Iterations</b> |
|-----------------------------------------|-----------------------------------|----------------|-----------------------|-------------------|
| <b>Raw data import</b>                  | e2import.py                       |                | 1                     |                   |
| <b>Tomographic reconstruction</b>       | e2tomogram.py <sup>†</sup>        | 12             | 9                     | 2,1,1,1           |
| <b>Reference-based particle picking</b> | e2spt_tempmatch.py                |                | 7                     |                   |
| <b>CTF correction</b>                   | e2spt_tomocf.py                   |                | 2                     |                   |
| <b>Subtomogram extraction</b>           | e2spt_extract.py <sup>†</sup>     | 1              | 31                    |                   |
| <b>Initial model generation</b>         | e2spt_sgd.py <sup>†</sup>         | 12             | 41                    | 3                 |
| <b>Subtomogram refinement</b>           | e2spt_refine.py <sup>†</sup>      | 12             | 181                   | 3                 |
| <b>Subtilt refinement</b>               | e2spt_tiltrefine.py <sup>†*</sup> | 96             | 308                   | 6                 |

**Supplementary Table 1.** Example program runtimes. Parallelism: \* = MPI, † = Thread.

Except for the final subtilt refinement all steps were performed on a single 12 core workstation. The final tilt refinement was run on 4x24 core nodes on a Linux cluster.

**Supplementary Table 2**

|                                 | <b>EMAN2</b>                                     | <b>IMOD/PEET</b>                | <b>pyTOM</b>         | <b>Relion</b>      | <b>emClarity</b>       |
|---------------------------------|--------------------------------------------------|---------------------------------|----------------------|--------------------|------------------------|
| <b>Tilt series alignment</b>    | Yes                                              | Yes                             | No                   | No                 | No                     |
| <b>Tomogram reconstruction</b>  | Yes                                              | Yes                             | Yes                  | No                 | No                     |
| <b>CTF correction</b>           | Per-particle-per-tilt                            | Strip-wise                      | No                   | Per-particle<br>3D | 3D back<br>projection  |
| <b>Particle selection</b>       | Manual,<br>template matching,<br>neural networks | Manual,<br>template<br>matching | Template<br>matching | No                 | Template<br>matching   |
| <b>Initial model generation</b> | Yes                                              | No                              | No                   | No                 | No                     |
| <b>Subtomogram alignment</b>    | Yes                                              | Yes                             | Yes                  | Yes                | Yes                    |
| <b>Subtilt alignment</b>        | Yes                                              | No                              | No                   | No                 | Yes (requires<br>IMOD) |

**Supplementary Table 2.** Comparison of features among different software packages for CryoET data processing.
